# Supplementary material for: Food seasoning-derived gel polymer electrolyte and pulse-plasma exfoliated graphene nanosheet electrodes for symmetrical solid-state supercapacitors
Source: Royal Society of Chemistry journal article supplement (doi:10.1039/d1ra07820h), 2022-01-01
Supplement: d1ra07820h1.pdf [file d1ra07820h1.pdf]

## Supporting information

### **Food spice-derived gel polymer electrolyte and pulse-plasma exfoliated graphene nanosheets electrodes for symmetrical solid-state supercapacitors**

Phuoc Anh Le<sup>1\*</sup>, Van Qui Le<sup>2</sup>, Nghia Trong Nguyen<sup>3</sup>, Thi Viet Bac Phung<sup>1\*</sup>

<sup>1</sup> Institute of Sustainability Science, VNU Vietnam Japan University, Vietnam National University, Hanoi 100000, Vietnam

<sup>2</sup> Department of Materials Science and Engineering, National Yang Ming Chiao Tung University, Hsinchu 300093, Taiwan

<sup>3</sup> School of Chemical Engineering, Hanoi University of Science and Technology, Hanoi 100000, Vietnam.

#### **\*Corresponding author:**

Phuoc Anh Le; E-mail: [lephuocanh86@vnu.edu.vn](mailto:lephuocanh86@vnu.edu.vn)

Thi Viet Bac Phung; E-mail: [ptv.bac@vju.ac.vn](mailto:ptv.bac@vju.ac.vn)

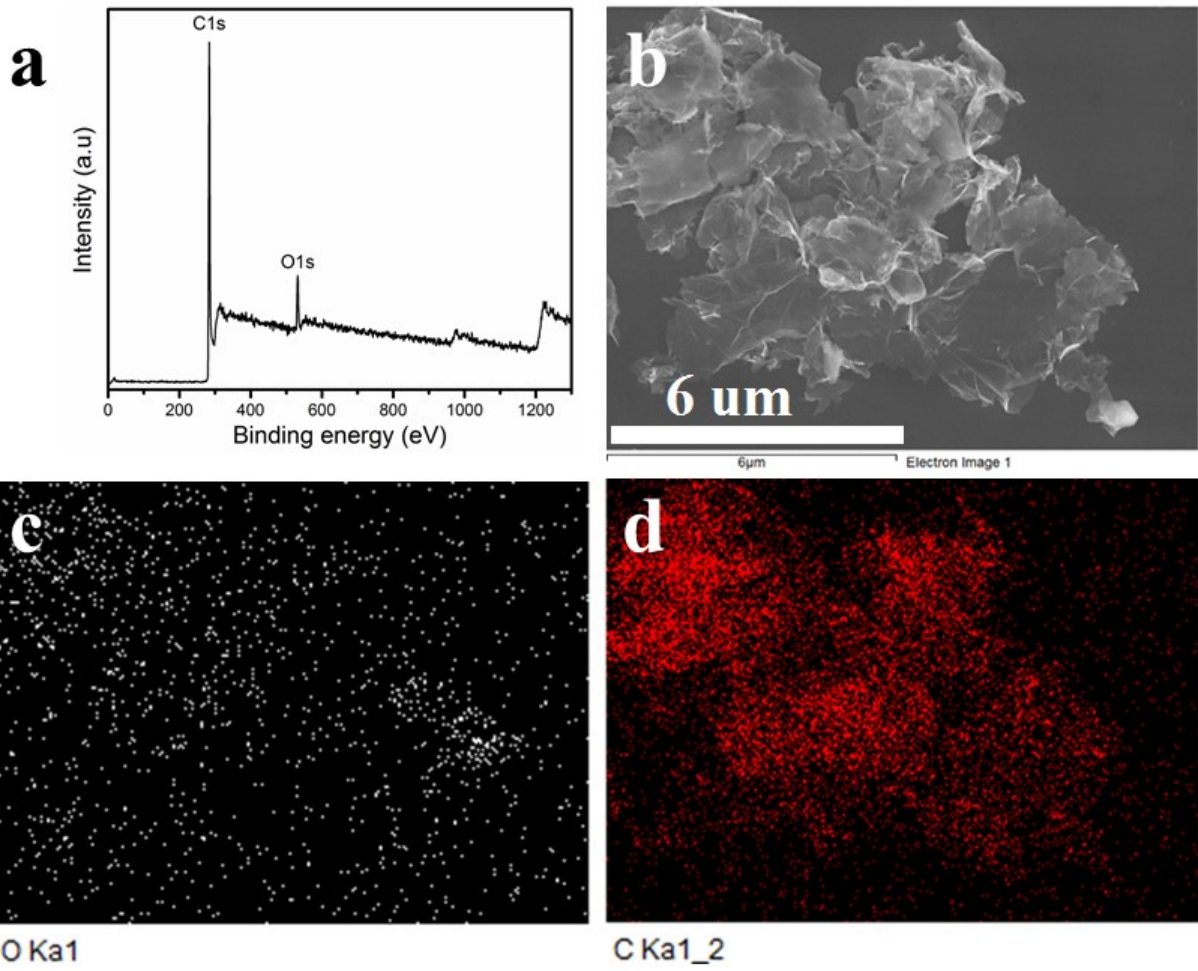

Figure S1 (a) XPS survey spectra and (b, c, d) SEM mapping of pulse control exfoliated graphene sheets.

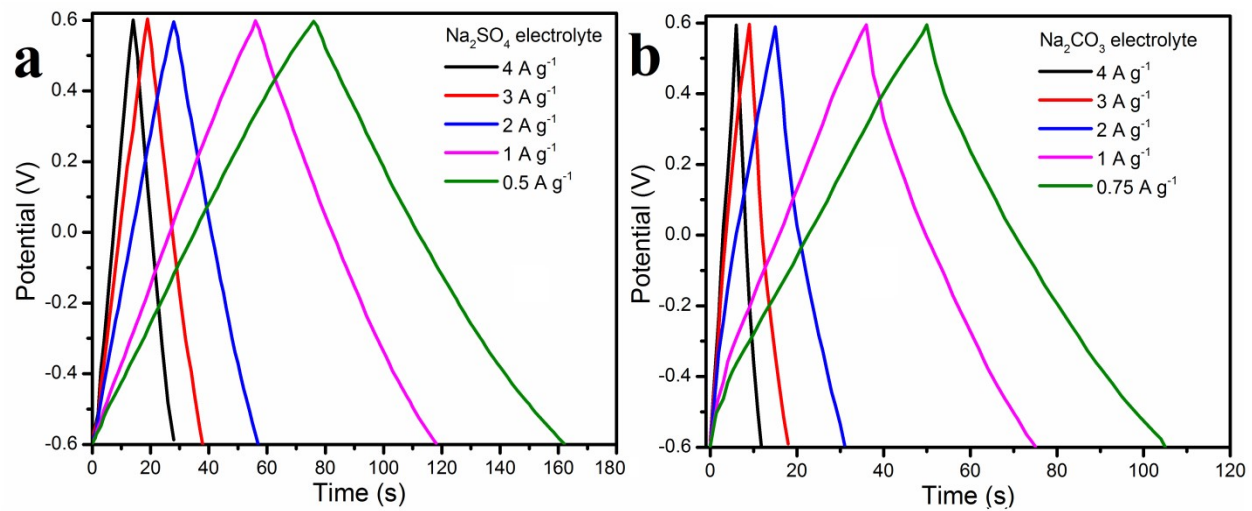

Figure S2 GCD curves of graphene sheets electrode in (a)  $\text{Na}_2\text{SO}_4$  1M and (b)  $\text{Na}_2\text{CO}_3$  1M electrolyte.

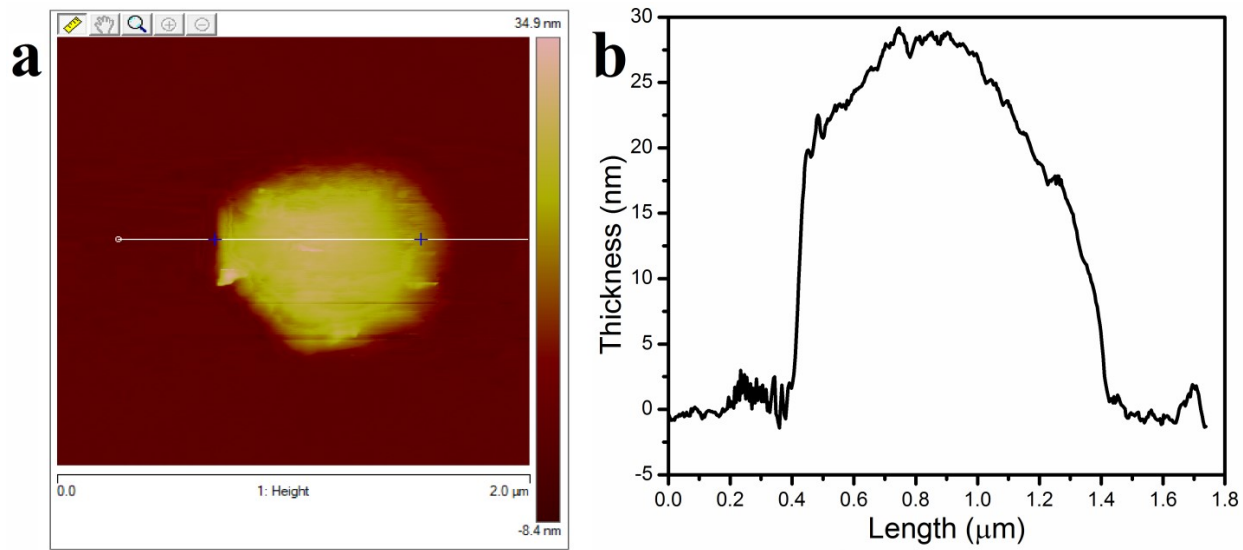

Figure S3 AFM profile of graphene nanosheets by surface-plasma method.

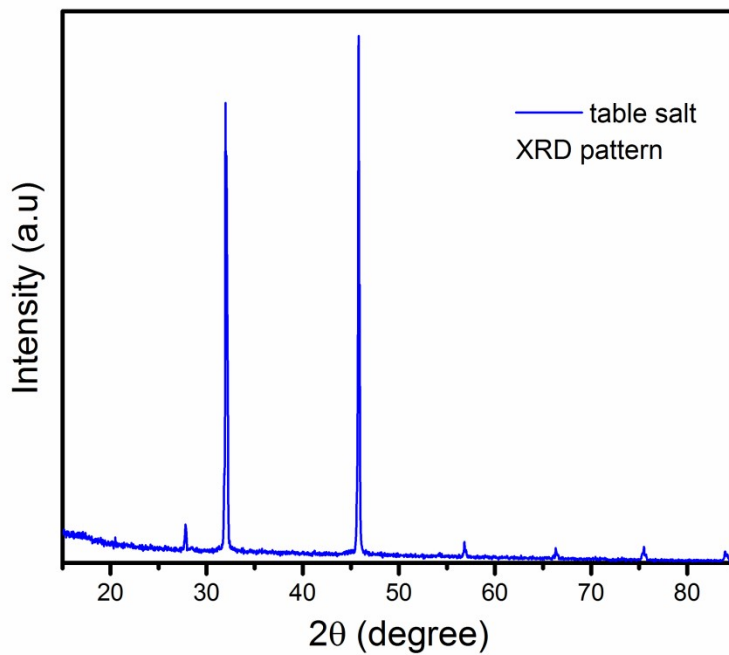

Figure S4 XRD pattern of table salt.
